# Supplementary material for: Long-Term Survival and Causes of Death After Diagnoses of Common Cancers in 3 Cohorts of US Health Professionals
Source: PubMed Central journal article supplement (PMC8973409; doi:10.1093/jncics/pkac021), 2022-03-08

## SUPPLEMENTARY MATERIALS

### Supplementary Tables

**Supplementary Table 1.** Top Three Non-Cancer Causes of Death among Men (1986 - 2018) Diagnosed with Common Cancers

| Ranking | Prostate                      | Lung and Bronchus      | Colon and Rectum                                   | Urinary Bladder                                    | Melanoma                                           |
|---------|-------------------------------|------------------------|----------------------------------------------------|----------------------------------------------------|----------------------------------------------------|
| 1       | Cardiovascular disease        | Cardiovascular disease | Cardiovascular disease                             | Cardiovascular disease                             | Cardiovascular disease                             |
| 2       | Respiratory disease           | Respiratory disease    | Respiratory disease                                | Respiratory disease                                | Hereditary and familial diseases of nervous system |
| 3       | Senile and presenile dementia | Accidental Falls       | Hereditary and familial diseases of nervous system | Hereditary and familial diseases of nervous system | Respiratory disease                                |

**Supplementary Table 2.** Top Three Non-Cancer Causes of Death among Women (1976 - 2017) Diagnosed with Common Cancers

| Ranking | Breast                        | Lung and Bronchus             | Colon and Rectum              | Uterine Corpus                | Thyroid                       |
|---------|-------------------------------|-------------------------------|-------------------------------|-------------------------------|-------------------------------|
| 1       | Cardiovascular disease        | Cardiovascular disease        | Cardiovascular disease        | Cardiovascular disease        | Cardiovascular disease        |
| 2       | Senile and presenile dementia | Respiratory disease           | Respiratory disease           | Senile and presenile dementia | Senile and presenile dementia |
| 3       | Respiratory disease           | Senile and presenile dementia | Senile and presenile dementia | Respiratory disease           | Respiratory disease           |

**Supplementary Table 3.** Slopes of Inflection Points and Year 10 for Colorectal, Urinary Bladder, Melanoma, Uterine Corpus, and Thyroid

Cancer

| Cancer            | Inflection Point, years | <i>P</i> <sup>a</sup> | Percentage Point Increase in Cumulative Mortality Proportion per 1 Year after Diagnosis     |                                                                                           |                                                        |
|-------------------|-------------------------|-----------------------|---------------------------------------------------------------------------------------------|-------------------------------------------------------------------------------------------|--------------------------------------------------------|
|                   |                         |                       | Slope before Inflection Point /Slope before Year 10<br>(Percentage Point Increase per Year) | Slope after Inflection Point /Slope after Year 10<br>(Percentage Point Increase per Year) | Ratios (after vs. before) for Inflection Point/Year 10 |
| <b>Men</b>        |                         |                       |                                                                                             |                                                                                           |                                                        |
| Lung and Bronchus | 15.4                    | <0.001                | 0.27/0.52                                                                                   | 0.06/0.08                                                                                 | 0.22/0.15                                              |
| Colon and Rectum  | 10.3                    | 0.16                  | 1.30/2.74                                                                                   | 0.09/0.12                                                                                 | 0.07/0.04                                              |
| Urinary Bladder   | 14.7                    | <0.001                | 0.40/0.56                                                                                   | 0.09/0.20                                                                                 | 0.23/0.36                                              |
| Melanoma          | 18.0                    | <0.001                | 0.08/0.22                                                                                   | 0.06/0.08                                                                                 | 0.75/0.36                                              |
| <b>Women</b>      |                         |                       |                                                                                             |                                                                                           |                                                        |
| Lung and Bronchus | 16.1                    | <0.001                | 0.45/0.49                                                                                   | 0.12/0.23                                                                                 | 0.27/0.47                                              |
| Colon and Rectum  | 15.2                    | <0.001                | 0.29/0.46                                                                                   | 0.13/0.18                                                                                 | 0.45/0.39                                              |
| Uterine Corpus    | 11.8                    | <0.001                | 0.25/0.45                                                                                   | 0.08/0.10                                                                                 | 0.32/0.22                                              |
| Thyroid           | 17.5                    | 1.00                  | 0.04/0.11                                                                                   | 0/0.04                                                                                    | 0/0.36                                                 |

<sup>a</sup> *P*-value was calculated using segmented regression model (2-sided).

**Supplementary Table 4.** Indirect Standardization of Incidence and Mortality Rates (1986-2018) of Common Cancers among Men using SEER

Incidence and Mortality Rates (White Population), 2012-2016<sup>a</sup>

| Cancer            | Incidence Rate (per 100,000 person-years) |       |     | Mortality Rate (per 100,000 person-years) |       |     |
|-------------------|-------------------------------------------|-------|-----|-------------------------------------------|-------|-----|
|                   | HPFS                                      | SEER  | SIR | HPFS                                      | SEER  | SMR |
| Prostate          | 634.8                                     | 410.9 | 1.5 | 74.4                                      | 55.4  | 1.3 |
| Lung and bronchus | 93.6                                      | 242.2 | 0.4 | 79.3                                      | 203.5 | 0.4 |
| Colon and rectum  | 105.0                                     | 132.1 | 0.8 | 43.7                                      | 53.0  | 0.8 |
| Urinary bladder   | 87.2                                      | 139.3 | 0.6 | 20.6                                      | 26.9  | 0.8 |
| Melanoma          | 181.2                                     | 114.6 | 1.6 | 14.8                                      | 14.7  | 1.0 |

<sup>a</sup> SEER= Surveillance, Epidemiology, and End Results; HPFS= Health Professionals Follow-up Study; SIR= Standardized Incidence Ratio; SMR= Standardized Mortality Ratio.

**Supplementary Table 5.** Indirect Standardization of Incidence and Mortality Rates of Common Cancers (1976-2017) among Women using SEER

Incidence and Mortality Rates (White Population), 2012-2016<sup>a</sup>

| Cancer            | Incidence Rate (per 100,000 person-years) |       |     | Mortality Rate (per 100,000 person-years) |      |     |
|-------------------|-------------------------------------------|-------|-----|-------------------------------------------|------|-----|
|                   | NHS and NHS II                            | SEER  | SIR | NHS and NHS II                            | SEER | SMR |
| Breast            | 275.6                                     | 259.4 | 1.1 | 44.1                                      | 35.6 | 1.2 |
| Lung and bronchus | 54.1                                      | 98.5  | 0.5 | 47.0                                      | 67.1 | 0.7 |
| Colon and rectum  | 45.6                                      | 56.7  | 0.8 | 19.3                                      | 18.1 | 1.1 |
| Uterine corpus    | 21.3                                      | 58.1  | 0.4 | 6.8                                       | 7.9  | 0.9 |
| Thyroid           | 14.8                                      | 39.6  | 0.4 | 0.6                                       | 0.7  | 0.8 |

<sup>a</sup> SEER= Surveillance, Epidemiology, and End Results; NHS= Nurses' Health Study; SIR= Standardized Incidence Ratio; SMR= Standardized Mortality Ratio.

**Supplementary Table 6.** Relative Survival % (95% CI) of Common Cancers among Men Compared to the U.S. White General Population

Matched on Age, Sex, Race and Calendar Year

| Year    | Prostate             | Lung and Bronchus | Colon and Rectum    | Urinary Bladder      | Melanoma             |
|---------|----------------------|-------------------|---------------------|----------------------|----------------------|
| 5-year  | 111.3 (110.3, 112.3) | 20.0 (17.4, 22.6) | 80.1 (76.7, 83.4)   | 98.0 (94.7, 101.3)   | 110.8 (109.0, 112.6) |
| 10-year | 124.0 (122.2, 125.9) | 15.5 (12.7, 18.3) | 81.8 (77.0, 86.7)   | 104.8 (99.4, 110.3)  | 121.4 (118.1, 124.7) |
| 15-year | 141.2 (137.9, 144.5) | 11.4 (8.2, 14.5)  | 91.0 (84.0, 97.9)   | 108.7 (100.0, 117.3) | 133.9 (128.6, 139.2) |
| 20-year | 166.7 (160.5, 172.9) | 10.9 (6.9, 15.0)  | 97.2 (86.8, 107.6)  | 121.7 (107.7, 135.7) | 149.3 (140.9, 157.7) |
| 25-year | 181.8 (167.9, 195.6) | 10.8 (4.9, 16.7)  | 100.0 (83.8, 116.3) | 139.9 (115.4, 164.3) | 168.2 (154.6, 181.8) |
| 30-year | 186.7 (139.2, 234.2) | 11.4 (4.3, 18.5)  | 76.2 (50.1, 102.3)  | 178.5 (133.0, 224.0) | 166.8 (142.4, 191.2) |

<sup>a</sup> CI = confidence interval.

**Supplementary Table 7.** Relative Survival % (95% CI) of Common Cancers among Women Compared to the U.S. White General Population

Matched on Age, Sex, Race and Calendar Year<sup>a</sup>

| Year    | Breast              | Lung and Bronchus | Colon and Rectum   | Uterine Corpus     | Thyroid              |
|---------|---------------------|-------------------|--------------------|--------------------|----------------------|
| 5-year  | 96.5 (96.0, 97.0)   | 25.5 (24.0, 27.0) | 71.4 (69.6, 73.2)  | 89.6 (87.6, 91.6)  | 100.9 (99.7, 102.1)  |
| 10-year | 95.5 (94.8, 96.3)   | 19.3 (17.8, 20.9) | 69.3 (67.0, 71.5)  | 90.6 (87.9, 93.2)  | 102.5 (100.7, 104.4) |
| 15-year | 96.3 (95.3, 97.3)   | 14.9 (13.2, 16.6) | 71.0 (68.2, 73.9)  | 92.3 (88.8, 95.8)  | 105.0 (102.4, 107.7) |
| 20-year | 98.1 (96.7, 99.5)   | 12.6 (10.6, 14.5) | 74.3 (70.6, 78.1)  | 93.9 (89.0, 98.7)  | 104.7 (100.7, 108.7) |
| 25-year | 100.6 (98.6, 102.6) | 10.3 (8.0, 12.6)  | 75.9 (70, 5, 81.3) | 96.3 (88.8, 103.7) | 110.7 (105.4, 115.9) |
| 30-year | 103.0 (99.7, 106.2) | 9.0 (6.1, 12.0)   | 79.7 (71.1, 88.3)  | 89.4 (77.4, 101.3) | 118.8 (109.9, 127.7) |
| 35-year | 105.1 (99.5, 110.7) | 7.1 (3.1, 11.0)   | 73.6 (57.6, 89.5)  | 93.9 (71.8, 115.9) | 117.2 (100.1, 134.2) |

<sup>a</sup> CI = confidence interval.

**Supplementary Table 8.** Comparison of Lifestyle Factors in the Three Cohorts and in the US White Population in 2010<sup>a</sup>

| Characteristics                                                | Men  |                     | Women          |                     |
|----------------------------------------------------------------|------|---------------------|----------------|---------------------|
|                                                                | HPFS | US White Population | NHS and NHS II | US White Population |
| Smoking, %                                                     |      |                     |                |                     |
| Never                                                          | 40.4 | 54.0                | 54.2           | 66.0                |
| Past <sup>b</sup>                                              | 55.8 | 25.0                | 35.6           | 18.0                |
| Current                                                        | 3.7  | 21.0                | 10.2           | 16.0                |
| Median alcohol consumption, drinks/d                           | 0.4  | 1.4                 | 0.1            | 0.5                 |
| Mean AHEI score                                                | 41.3 | 35.7                | 48.5           | 39.0                |
| Met 2008 federal physical activity guidelines <sup>c</sup> , % | 87.3 | 54.0                | 57.4           | 47.0                |
| Mean BMI, kg/m <sup>2</sup>                                    | 26.6 | 26.4                | 24.9           | 26.9                |

<sup>a</sup> All variables are age-adjusted based on the age distribution of the US population in 2000. HPFS = Health Professionals Follow-up Study; NHS = Nurses' Health Study; AHEI = Alternative Healthy Eating Index; BMI = body mass index

<sup>b</sup> Past smokers were persons who had smoked at least 100 cigarettes in their lifetime but no longer smoked at all.

<sup>c</sup> The 2008 federal guidelines recommend at least 150 minutes (2 hours and 30 minutes) a week of moderate-intensity or 75 minutes (1 hour and 15 minutes) a week of vigorous-intensity aerobic physical activity or an equivalent combination.



## Supplementary Figures

**Supplementary Figure 1.** Relative Survival (%) of Common Cancers among Men Compared to the U.S.

White General Population Matched on Age, Sex, Race and Calendar Year

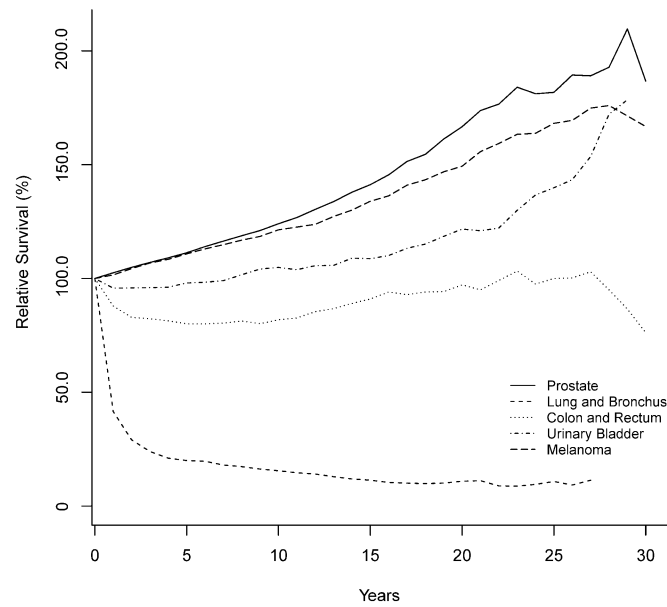

**Supplementary Figure 2.** Relative Survival (%) of Common Cancers among Women Compared to the U.S. White General Population Matched on Age, Sex, Race and Calendar Year

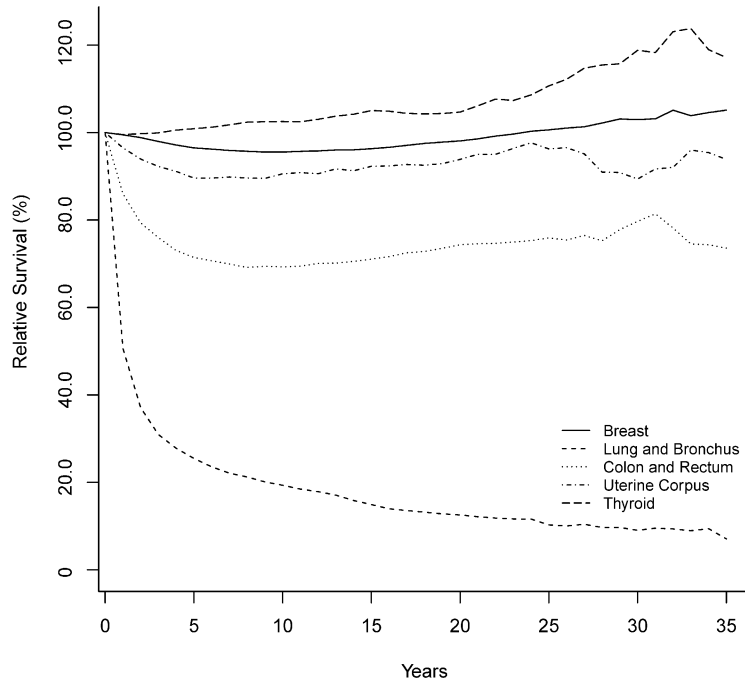

**Supplementary Figure 3.** Cancer-specific Cumulative Mortality (%) of Men Diagnosed with Common Cancers from SEER 18 Regs Research Database, 2000-201

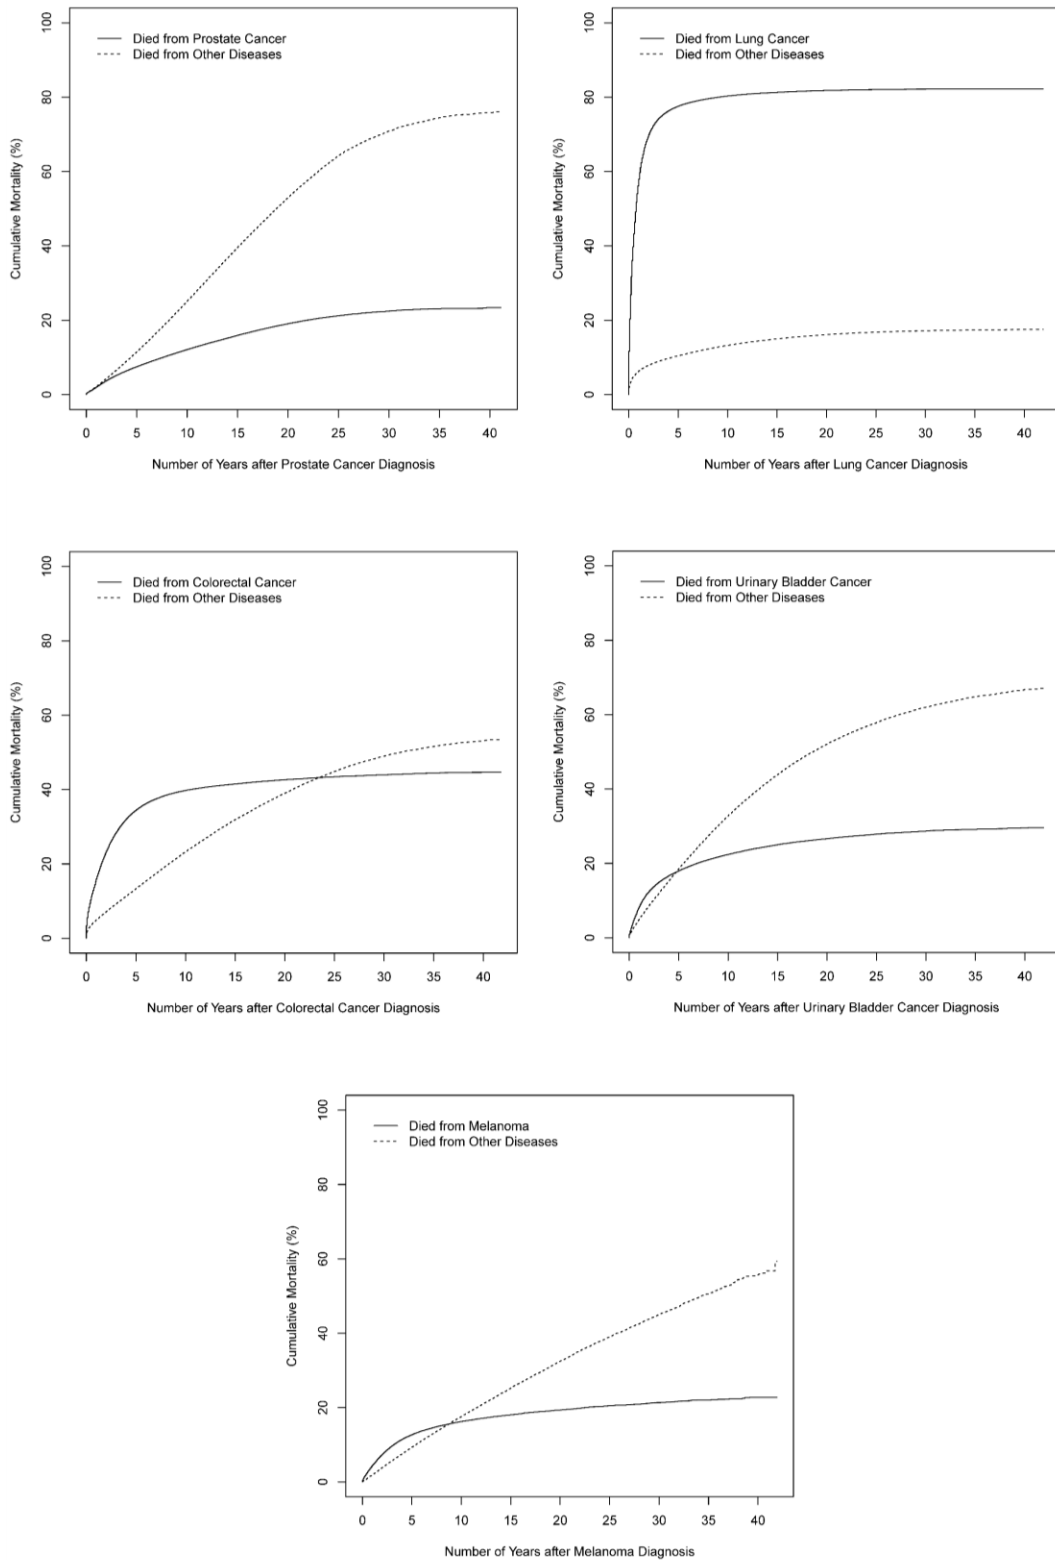

**Supplementary Figure 4.** Cancer-specific Cumulative Mortality (%) of Women Diagnosed with Common Cancers from SEER 18 Regs Research Database, 2000-2016

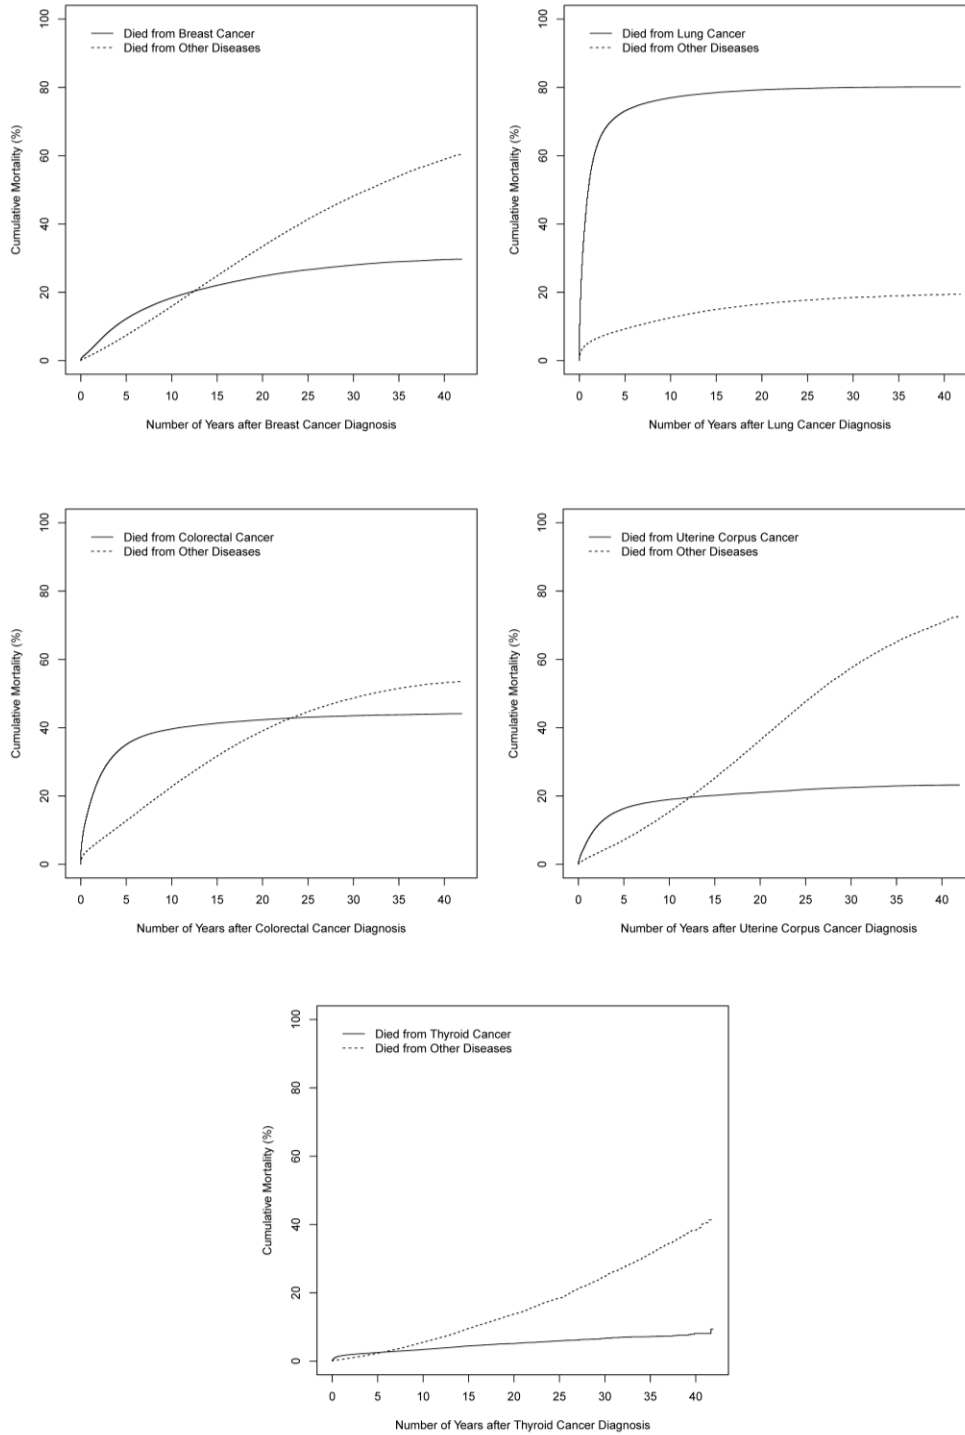

Supplement: pkac021_supplementary_data.pdf [file pkac021_supplementary_data.pdf]
